# Supplementary material
Source: publisher figshare collection journal article supplement (https://tandf.figshare.com/ndownloader/files/24423206)
Supplement: Supplementary file 1 [file 24423206]

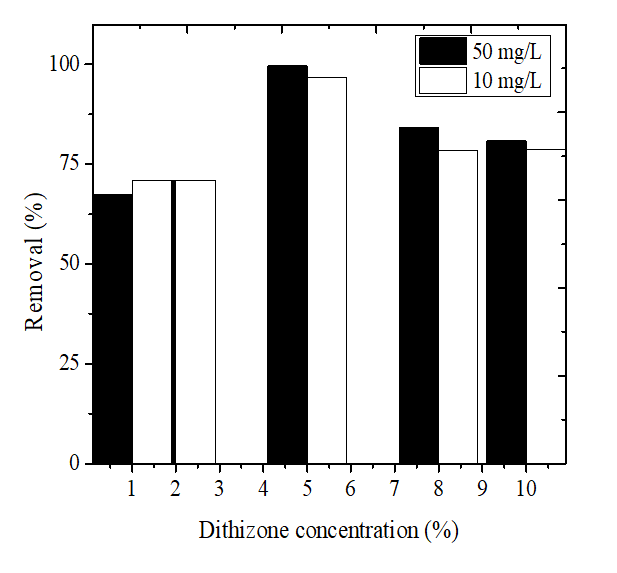


Figure S1. Effect of dithizone concentration on Hg2+ removal at the initial concentration of 10 and 50 mg/L
